# Supplementary material for: Synthesis, Characterization and Evaluation of the Cytotoxicity of Ni‐Doped Zn(Se,S) Quantum Dots
Source: Hindawi journal article supplement (doi:10.1155/2015/702391), 2015-01-01
Supplement: f1 [file 702391.f1.doc]

FT-IR spectra for (a) 2-Mercaptopropionic acid and (b) Ni-doped MPA-capped Zn-based QDs synthesized under microwave irradiation at 140° C and 30 minutes of reaction.
